# Supplementary material for: Colorimetric recognition and sensing of nitrite with unmodified gold nanoparticles based on a specific diazo reaction with phenylenediamine
Source: Royal Society of Chemistry journal article supplement (doi:10.1039/c2an35204d), 2012-01-01
Supplement: c2an35204d.pdf [file c2an35204d.pdf]

## Supporting Information

### Colorimetric recognition and sensing of nitrite with unmodified gold nanoparticles based on a specific diazo reaction with phenylenediamine

Jia Zhang, Cheng Yang, Xiaolei Wang, and Xiurong Yang\*

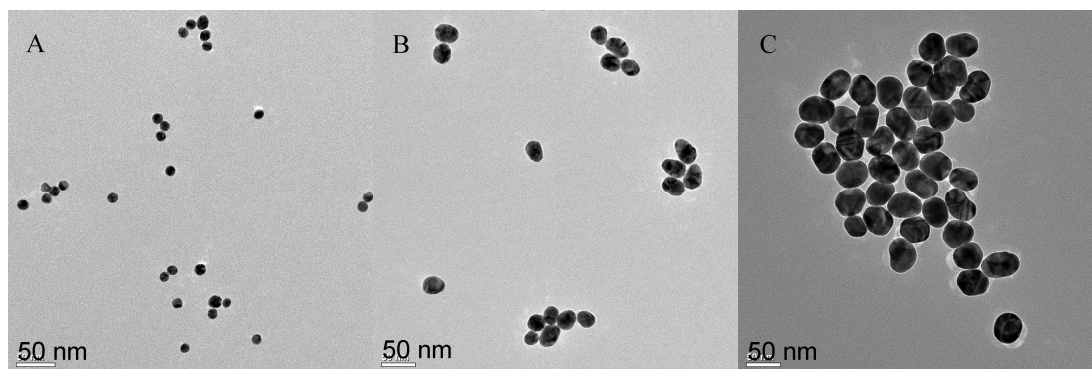

**Fig. S1** TEM images of the Au nanoparticles of average 13 (A), 28 (B), and 43 nm (C) diameters.

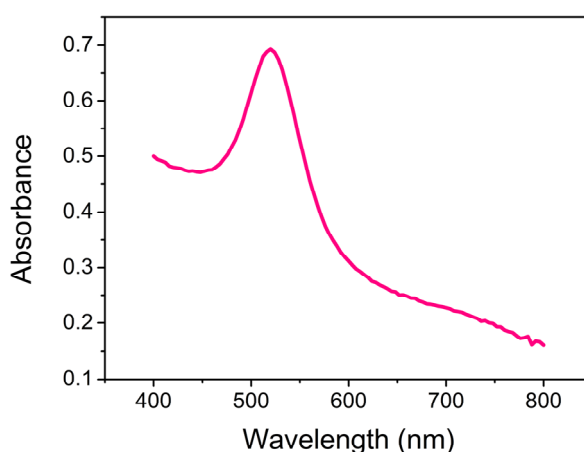

**Fig. S2** Absorption spectra for the citrate-capped Au NP (13 nm) solution (50  $\mu$ L Au + 50  $\mu$ L water) in the presence of 2.5  $\mu$ M PPD and 30 mM  $\text{H}_3\text{PO}_4$ .

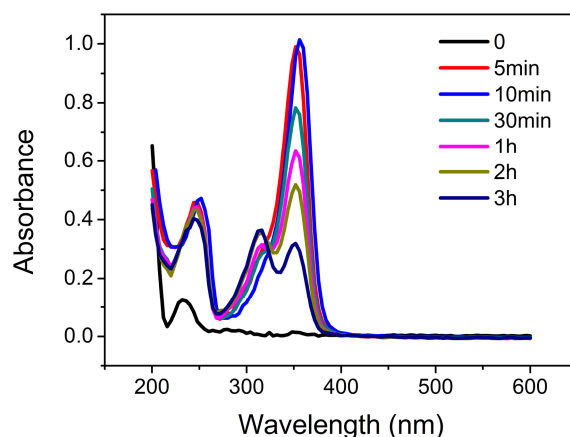

**Fig. S3** UV-vis spectra for the solution of PPD + H<sub>3</sub>PO<sub>4</sub> + NO<sub>2</sub><sup>-</sup> as a function of reaction time. Conditions: 5 mM H<sub>3</sub>PO<sub>4</sub>; 50 μM PPD; 0.5 mM NO<sub>2</sub><sup>-</sup> and 18 °C for the diazo reaction.

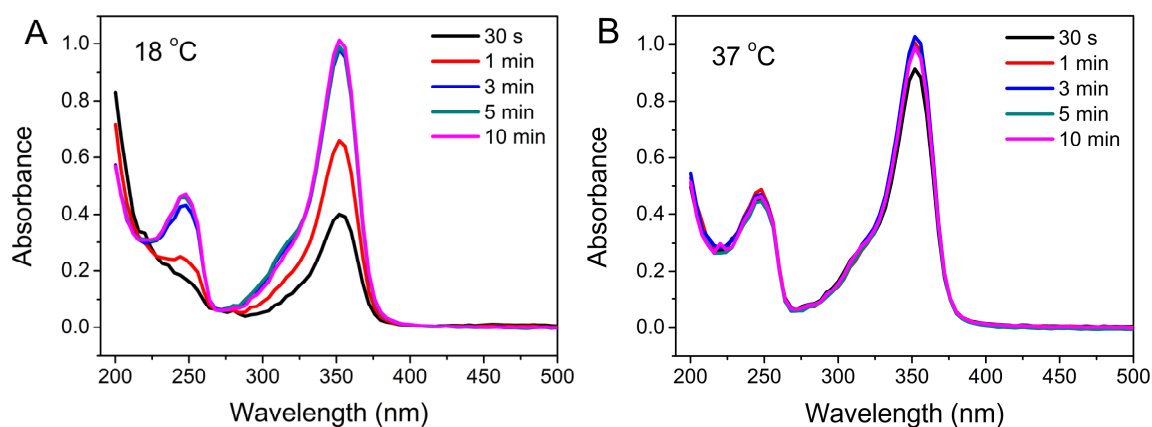

**Fig. S4** UV-vis spectra for the solution of PPD + H<sub>3</sub>PO<sub>4</sub> + NO<sub>2</sub><sup>-</sup> within 10 min of reaction as a function of operating temperature. Conditions: 5 mM H<sub>3</sub>PO<sub>4</sub>; 50 μM PPD and 0.5 mM NO<sub>2</sub><sup>-</sup>.

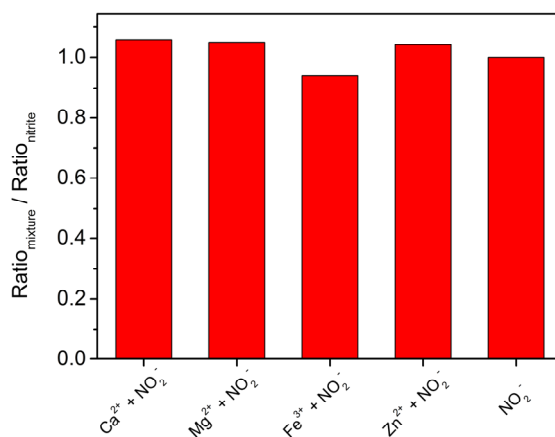

**Fig. S5** Interference study of the sensor in the presence of a mixture of nitrite (10 μM) and one other metallic ion (0.1 mM). All data are based on the average of two measurements.

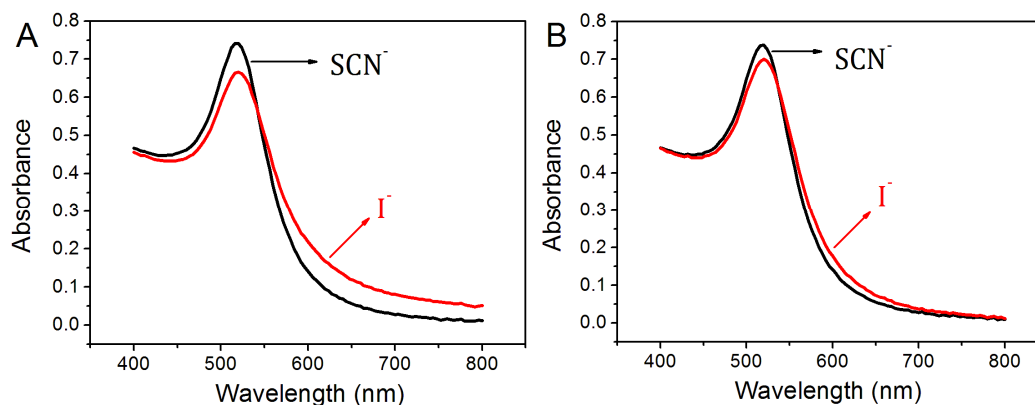

**Fig. S6** (A) Absorbance spectra for the Au NP (13 nm) buffered solution after the addition of the reaction solution of  $\text{H}_3\text{PO}_4 + \text{PPD} + \text{NO}_2^-$  in the presence of thiocyanate or iodide. Conditions: 50  $\mu\text{L}$  Au + 50  $\mu\text{L}$  PBS (30 mM, pH 9.0); 5  $\mu\text{L}$   $\text{H}_3\text{PO}_4$  (0.01 M); 2.5  $\mu\text{M}$  PPD; 10  $\mu\text{M}$  for anions; and 37  $^\circ\text{C}$ , 10 min for the diazo reaction as well as 1 min for the colorimetric response. (B) Absorbance spectra for the Au NP (13 nm) buffered solution after the addition of PPD in the presence of thiocyanate or iodide. Conditions: 50  $\mu\text{L}$  Au + 50  $\mu\text{L}$  PBS (30 mM, pH 9.0); 2.5  $\mu\text{M}$  PPD; 10  $\mu\text{M}$  for anions; and 1 min for the colorimetric response.
